# Supplementary material
Source: PubMed Central journal article supplement (PMC2715809)

1 **Figure S1. The presence of NP-40 and an excess of the RNA substrate reduce**  
2 **processing efficiency.** In vitro 3' end processing of the 5'-labeled 86-nucleotide H2a  
3 RNA. Processing was carried out in a mouse nuclear extract under control conditions  
4 (lanes 2 and 6), or in the presence of 0.2% NP-40 and/or 0.125 pmol of unlabeled H2a  
5 substrate (2.5 fold excess compared to the labeled substrate), as indicated at the top of  
6 each lane. Reactions were carried out for 20 or 60 min. Lane 1 contains only the input  
7 RNA. UV irradiation was started 10 min after placing samples at 32°C and completed  
8 before the 20 min time point.

1 **Figure S2. 0.1% NP-40 completely inhibits processing of the FL/5s RNA. A.** Time  
2 course of in vitro processing of the FL/5s RNA (10-30 min). UV irradiation was started  
3 10 min after placing samples at 32°C and completed before the 20 min time point when  
4 about 50% of the input RNA was processed. Products generated by cleavage at the major  
5 and minor cleavage site are indicated with a larger and smaller arrow, respectively. **B.**  
6 The effect of 0.1% NP-40 and the anti-mU7 oligonucleotide on the efficiency of  
7 processing after 90 min of incubation at 32°C. Note that both reagents completely inhibit  
8 processing.  
9

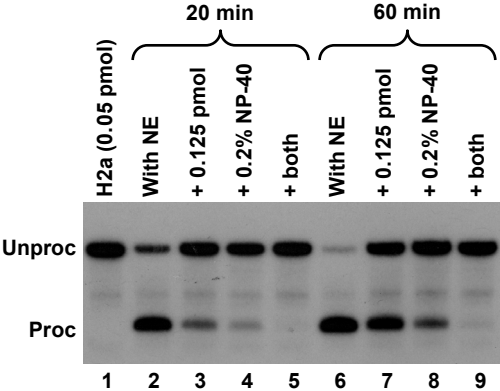

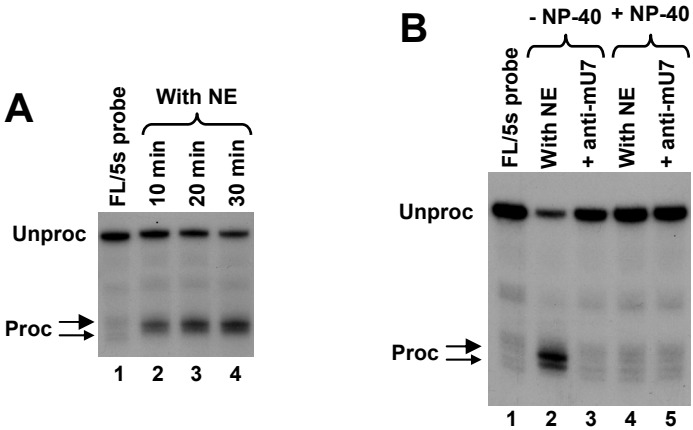

Supplement: supp_29_15_4045__1.pdf [file supp_29_15_4045__1.pdf]
